# Supplementary material for: Deterministic multi-phonon entanglement between two mechanical resonators on separate substrates
Source: Springer Nature journal article supplement (doi:10.1038/s41467-025-56454-0), 2025-02-07
Supplement: MOESM3 [file 41467_2025_56454_MOESM3_ESM.xlsx]

## Sheet: Fig.2c Raw Data
Time	PA	PB
0	0.893667	0.924333
2	0.849	0.907667
4	0.848667	0.842
6	0.839667	0.777
8	0.788333	0.701667
10	0.698333	0.649333
12	0.645	0.595333
14	0.635	0.547333
16	0.601333	0.476
18	0.553	0.438667
20	0.494667	0.401667
22	0.466667	0.331
24	0.424	0.272
26	0.352667	0.218667
28	0.313	0.151333
30	0.249	0.124333
32	0.192333	0.065
34	0.139667	0.0466667
36	0.105667	0.027
38	0.0703333	0.0216667
40	0.0543333	0.02
42	0.0303333	0.0413333
44	0.0223333	0.071
46	0.03	0.106333
48	0.0333333	0.147
50	0.0516667	0.181
52	0.0686667	0.238667
54	0.0936667	0.304333
56	0.128667	0.364
58	0.157667	0.410333
60	0.207	0.477
62	0.267333	0.527
64	0.320333	0.591333
66	0.349667	0.656667
68	0.401333	0.659667
70	0.459667	0.672667
72	0.495333	0.706667
74	0.527667	0.699333
76	0.554667	0.693
78	0.605	0.670667
80	0.644667	0.619333
82	0.67	0.603667
84	0.654667	0.551333
86	0.685	0.496667
88	0.685667	0.463
90	0.702333	0.394
92	0.659333	0.334333
94	0.650667	0.273
96	0.618667	0.214333
98	0.61	0.178
100	0.559333	0.125333
102	0.502333	0.0853333
104	0.466333	0.057
106	0.429667	0.035
108	0.383667	0.0253333
110	0.323667	0.024
112	0.271333	0.028
114	0.22	0.043
116	0.179	0.0773333
118	0.151333	0.114
120	0.120667	0.151333
122	0.0846667	0.194333
124	0.0623333	0.254333
126	0.0513333	0.306333
128	0.035	0.349667
130	0.0283333	0.388333
132	0.0376667	0.453667
134	0.042	0.483333
136	0.0656667	0.533
138	0.0906667	0.556667
140	0.124667	0.594333
142	0.139667	0.586667
144	0.169	0.587
146	0.224	0.571
148	0.271667	0.563
150	0.304333	0.537667
152	0.351667	0.524667
154	0.384667	0.470667
156	0.422333	0.439333
158	0.458667	0.357667
160	0.499667	0.333
162	0.532333	0.267667
164	0.571667	0.218667
166	0.578	0.168333
168	0.586667	0.136
170	0.615	0.1
172	0.611	0.073
174	0.601333	0.046
176	0.590667	0.037
178	0.584333	0.034
180	0.555667	0.0376667
182	0.507667	0.0513333
184	0.472	0.075
186	0.438333	0.101
188	0.399333	0.147
190	0.354667	0.180333
192	0.324667	0.218333
194	0.273	0.26
196	0.225667	0.321
198	0.179667	0.364333
200	0.169	0.403333
202	0.136	0.454333
204	0.0923333	0.474333
206	0.0766667	0.492
208	0.0536667	0.494333
210	0.041	0.503667
212	0.038	0.508333
214	0.0313333	0.481333
216	0.041	0.474667
218	0.0546667	0.452667
220	0.0693333	0.414333
222	0.093	0.387667
224	0.123	0.352333
226	0.157333	0.306
228	0.181333	0.261
230	0.209	0.203333
232	0.262333	0.179667
234	0.303333	0.124333
236	0.331	0.091
238	0.392667	0.066
240	0.421333	0.0473333
242	0.441333	0.035
244	0.472333	0.038
246	0.495667	0.0356667
248	0.521333	0.0513333
250	0.535333	0.0703333

## Sheet: Fig.3c Raw Data
Time	Pgg	Pge	Peg	Pee
0	0.958209	0.0119403	0.0293532	0.000497512
2	0.957214	0.0119403	0.0303483	0.000497512
4	0.944776	0.0159204	0.038806	0.000497512
6	0.914428	0.0258706	0.0567164	0.00298507
8	0.873632	0.0447761	0.0791045	0.00248756
10	0.850746	0.0572139	0.0865672	0.00547264
12	0.815423	0.0776119	0.105473	0.00149254
14	0.768159	0.0910448	0.132338	0.00845771
16	0.727861	0.131343	0.129851	0.0109453
18	0.673134	0.145771	0.172637	0.00845771
20	0.622388	0.175622	0.193532	0.00845771
22	0.578109	0.214925	0.197015	0.00995025
24	0.518408	0.200995	0.262687	0.0179104
26	0.510945	0.231343	0.243781	0.0139303
28	0.462687	0.248259	0.271642	0.0174129
30	0.428856	0.258706	0.297015	0.0154229
32	0.423383	0.28806	0.271144	0.0174129
34	0.371642	0.261692	0.353234	0.0134328
36	0.385572	0.276119	0.31592	0.0223881
38	0.392537	0.308955	0.281592	0.0169154
40	0.368657	0.273134	0.338806	0.019403
42	0.402985	0.264677	0.310448	0.0218905
44	0.414925	0.250746	0.314925	0.019403
46	0.464179	0.198507	0.318408	0.0189055
48	0.487562	0.224876	0.270647	0.0169154
50	0.499502	0.181095	0.306965	0.0124378
52	0.576617	0.153234	0.257711	0.0124378
54	0.59801	0.147761	0.241294	0.0129353
56	0.643284	0.104975	0.243781	0.0079602
58	0.722388	0.0880597	0.182587	0.00696517
60	0.752736	0.0606965	0.182587	0.0039801
62	0.788557	0.039801	0.167662	0.0039801
64	0.814925	0.0402985	0.142786	0.00199005
66	0.849751	0.0223881	0.127363	0.000497512
68	0.893035	0.0149254	0.0890547	0.00298507
70	0.916915	0.0109453	0.0681592	0.0039801
72	0.918408	0.0119403	0.0686567	0.000995025
74	0.924378	0.0164179	0.0562189	0.00298507
76	0.923383	0.0278607	0.0482587	0.000497512
78	0.931343	0.0348259	0.0323383	0.00149254
80	0.929851	0.0457711	0.0238806	0.000497512
82	0.904478	0.0686567	0.0253731	0.00149254
84	0.898507	0.0761194	0.0223881	0.00298507
86	0.850746	0.10597	0.0393035	0.0039801
88	0.812935	0.134328	0.0457711	0.00696517
90	0.805473	0.143284	0.0472637	0.0039801
92	0.757711	0.172139	0.0597015	0.0104478
94	0.734826	0.183582	0.0731343	0.00845771
96	0.676119	0.224876	0.0875622	0.0114428
98	0.658706	0.204975	0.124876	0.0114428
100	0.619403	0.235821	0.134826	0.00995025
102	0.587562	0.245771	0.157214	0.00945274
104	0.587065	0.2199	0.183085	0.00995025
106	0.551741	0.259204	0.174627	0.0144279
108	0.524876	0.21592	0.246766	0.0124378
110	0.502488	0.238308	0.247264	0.0119403
112	0.545274	0.20398	0.242289	0.00845771
114	0.531841	0.174129	0.281095	0.0129353
116	0.526866	0.207463	0.253731	0.0119403
118	0.542786	0.163682	0.2801	0.0134328
120	0.558209	0.118905	0.308458	0.0144279
122	0.578109	0.128856	0.282587	0.0104478
124	0.620398	0.0955224	0.274627	0.00945274
126	0.643781	0.0791045	0.271642	0.00547264
128	0.639801	0.0731343	0.279104	0.0079602
130	0.683582	0.0422886	0.265672	0.00845771
132	0.708458	0.038806	0.244776	0.0079602
134	0.699502	0.0283582	0.267164	0.00497512
136	0.756219	0.0149254	0.223383	0.00547264
138	0.774129	0.00895522	0.214925	0.00199005
140	0.779104	0.0159204	0.201493	0.00348259
142	0.797015	0.0164179	0.183582	0.00298507
144	0.820398	0.0174129	0.159204	0.00298507
146	0.833333	0.038806	0.122388	0.00547264
148	0.824876	0.0462687	0.125373	0.00348259
150	0.820398	0.0631841	0.112935	0.00348259
152	0.8199	0.0850746	0.0920398	0.00298507
154	0.825373	0.0910448	0.0800995	0.00348259
156	0.825871	0.1199	0.0512438	0.00298507
158	0.808458	0.126866	0.0577114	0.00696517
160	0.807463	0.154229	0.0323383	0.00597015
162	0.782587	0.181095	0.0293532	0.00696517
164	0.769652	0.197512	0.0273632	0.00547264
166	0.761692	0.205473	0.0273632	0.00547264
168	0.748259	0.20995	0.0328358	0.00895522
170	0.737313	0.226368	0.0308458	0.00547264
172	0.727861	0.20995	0.0547264	0.00746269
174	0.730348	0.212935	0.0497512	0.00696517
176	0.744776	0.183582	0.0646766	0.00696517
178	0.721393	0.18209	0.0895522	0.00696517
180	0.703483	0.194527	0.0945274	0.00746269
182	0.721891	0.132836	0.137811	0.00746269
184	0.723881	0.150746	0.1199	0.00547264
186	0.704975	0.140299	0.147264	0.00746269
188	0.715423	0.1	0.176617	0.0079602
190	0.738308	0.0900498	0.164179	0.00746269
192	0.714428	0.0701493	0.208458	0.00696517
194	0.726866	0.0651741	0.202488	0.00547264

## Sheet: Fig.3d
States	Population	Errbar
00	0.201559	0.00571084
01	0.39002	0.00419135
02	5.60424e-16	3.21857e-16
03	8.7197e-17	2.97871e-16
04	8.32972e-16	2.89112e-16
10	0.408422	0.00512902
11	0	0.00075894
12	0	2.41858e-16
13	1.16315e-16	1.8321e-16
14	7.00889e-16	2.00085e-16
20	6.4571e-17	1.85151e-16
21	0	1.54975e-16
22	2.96251e-16	2.587e-16
23	0	2.49326e-16
24	4.16761e-16	2.37989e-16
30	0	0.000820696
31	0	1.452e-16
32	0	1.14861e-16
33	0	1.66303e-16
34	2.55086e-16	1.98239e-16
40	0	0.0013344
41	0	1.21302e-16
42	0	1.97948e-16
43	1.37423e-17	1.50926e-16
44	0	1.65493e-16

## Sheet: Fig.3e
	00	01	10	11
00	0.23155	0.0976444	0.0575548	0
01	0.0976444	0.41139	0.380487	0
10	0.0575548	0.380487	0.35706	0
11	0	0	0	0

## Sheet: Fig.4c Raw Data
Time	Pgg	Pge	Peg	Pee
0	0.788224	0.0756487	0.132934	0.00319361
2	0.811178	0.0628743	0.118363	0.00758483
4	0.786826	0.0660679	0.141517	0.00558882
6	0.772655	0.0738523	0.147904	0.00558882
8	0.748303	0.0810379	0.16507	0.00558882
10	0.730339	0.0972056	0.165269	0.00718563
12	0.68024	0.115968	0.196208	0.00758483
14	0.644112	0.139721	0.207984	0.00818363
16	0.598004	0.161078	0.229341	0.0115768
18	0.571457	0.176048	0.242914	0.00958084
20	0.52475	0.210379	0.253892	0.010978
22	0.503792	0.218164	0.26507	0.0129741
24	0.493613	0.222355	0.273054	0.010978
26	0.466667	0.233932	0.285629	0.0137725
28	0.445309	0.247305	0.294012	0.0133733
30	0.451697	0.249102	0.278044	0.0211577
32	0.458683	0.250299	0.273253	0.0177645
34	0.478643	0.233533	0.272056	0.0157685
36	0.502595	0.217365	0.266667	0.0133733
38	0.521357	0.214571	0.251497	0.0125749
40	0.550299	0.208982	0.228743	0.011976
42	0.582435	0.170659	0.235928	0.010978
44	0.611577	0.162475	0.215768	0.0101796
46	0.641118	0.14491	0.20519	0.00878244
48	0.662675	0.146108	0.184431	0.00678643
50	0.706986	0.110379	0.174451	0.00818363
52	0.726547	0.100399	0.166467	0.00658683
54	0.742515	0.0976048	0.152495	0.00738523
56	0.756088	0.0932136	0.142715	0.00798403
58	0.753493	0.0976048	0.142515	0.00638723
60	0.745709	0.107585	0.141317	0.00538922
62	0.740719	0.110778	0.13992	0.00858283
64	0.733134	0.112974	0.146108	0.00778443
66	0.706387	0.128743	0.157086	0.00778443
68	0.695409	0.138323	0.156088	0.0101796
70	0.683234	0.143912	0.161677	0.0111776
72	0.675649	0.142914	0.173653	0.00778443
74	0.658882	0.157685	0.174052	0.00938124
76	0.637725	0.161876	0.190419	0.00998004
78	0.616966	0.17485	0.197006	0.0111776
80	0.6002	0.181836	0.205788	0.0121756
82	0.584631	0.181437	0.220958	0.0129741
84	0.59481	0.178044	0.212176	0.0149701
86	0.582635	0.183832	0.220958	0.0125749
88	0.603593	0.167864	0.215369	0.0131737
90	0.591218	0.173253	0.222754	0.0127745
92	0.608982	0.156687	0.223752	0.0105788
94	0.617964	0.154491	0.217764	0.00978044
96	0.623154	0.151098	0.21517	0.0105788
98	0.639721	0.140719	0.209581	0.00998004
100	0.643513	0.14491	0.201996	0.00958084
102	0.661477	0.130539	0.199401	0.00858283
104	0.649301	0.144711	0.196208	0.00978044
106	0.663074	0.142914	0.184232	0.00978044
108	0.670659	0.140719	0.179641	0.00898204
110	0.685429	0.138523	0.165469	0.0105788
112	0.678443	0.147705	0.16507	0.00878244
114	0.675449	0.152096	0.162675	0.00978044
116	0.683034	0.1501	0.158483	0.00838323
118	0.670659	0.161876	0.157285	0.0101796
120	0.673852	0.16008	0.155888	0.0101796
122	0.670858	0.146307	0.174251	0.00858283
124	0.667665	0.158683	0.166467	0.00718563
126	0.670858	0.141317	0.177046	0.0107784
128	0.666467	0.158483	0.166667	0.00838323
130	0.661876	0.163872	0.166667	0.00758483
132	0.663074	0.141317	0.183633	0.011976
134	0.658882	0.140319	0.191617	0.00918164
136	0.675649	0.131138	0.184032	0.00918164
138	0.671457	0.113174	0.203792	0.0115768
140	0.667066	0.115768	0.206786	0.0103792
142	0.672854	0.11018	0.20519	0.0117764
144	0.694411	0.100798	0.19521	0.00958084
146	0.691218	0.106188	0.194012	0.00858283
148	0.685429	0.100998	0.203992	0.00958084
150	0.7	0.1002	0.190619	0.00918164
152	0.695808	0.11018	0.182635	0.0113772
154	0.69002	0.116168	0.183633	0.0101796
156	0.684631	0.123154	0.182435	0.00978044
158	0.683832	0.131936	0.173253	0.010978
160	0.687425	0.141317	0.163074	0.00818363
162	0.686427	0.145309	0.159481	0.00878244
164	0.679441	0.164072	0.147904	0.00858283
166	0.666068	0.172056	0.150499	0.0113772
168	0.668263	0.17984	0.143313	0.00858283
170	0.671058	0.186826	0.133134	0.00898204
172	0.688224	0.167864	0.135729	0.00818363
174	0.690619	0.162675	0.136527	0.0101796
176	0.70519	0.162076	0.123353	0.00938124
178	0.7002	0.166267	0.126946	0.00658683
180	0.694611	0.158483	0.137126	0.00978044
182	0.683832	0.155689	0.149501	0.010978
184	0.698204	0.142116	0.147705	0.011976
186	0.700599	0.133932	0.158283	0.00718563
188	0.706587	0.123752	0.162275	0.00738523
190	0.71018	0.11477	0.166866	0.00818363
192	0.708583	0.10499	0.178244	0.00818363
194	0.722754	0.0896208	0.181437	0.00618762
196	0.706587	0.0918164	0.192216	0.00938124
198	0.701597	0.0846307	0.204591	0.00918164
200	0.700798	0.0872255	0.202395	0.00958084
202	0.703593	0.0892216	0.198603	0.00858283
204	0.701198	0.0878244	0.199401	0.0115768
206	0.703792	0.0926148	0.192016	0.0115768
208	0.697006	0.0974052	0.195609	0.00998004
210	0.701597	0.107385	0.182635	0.00838323
212	0.689621	0.117365	0.184232	0.00878244
214	0.676447	0.123752	0.191417	0.00838323
216	0.677046	0.128543	0.182036	0.0123752
218	0.692814	0.138922	0.157685	0.0105788
220	0.681437	0.148303	0.16008	0.0101796
222	0.690818	0.151697	0.147705	0.00978044
224	0.681637	0.159281	0.150699	0.00838323
226	0.7002	0.153693	0.137126	0.00898204
228	0.70998	0.156687	0.123353	0.00998004
230	0.711976	0.151896	0.126747	0.00938124
232	0.728343	0.146507	0.116367	0.00878244
234	0.72515	0.142914	0.12475	0.00718563
236	0.739721	0.135928	0.116966	0.00738523
238	0.735529	0.137725	0.11976	0.00698603
240	0.745309	0.12016	0.12475	0.00978044
242	0.746707	0.124351	0.11976	0.00918164
244	0.756088	0.111377	0.122954	0.00958084
246	0.756287	0.107784	0.126946	0.00898204
248	0.745509	0.104391	0.140519	0.00958084
250	0.751497	0.102994	0.136527	0.00898204
252	0.747705	0.0986028	0.146307	0.00738523
254	0.73493	0.10499	0.154092	0.00598802
256	0.727345	0.106387	0.155289	0.010978
258	0.726148	0.100399	0.164072	0.00938124
260	0.736527	0.0914172	0.162874	0.00918164
262	0.721557	0.0974052	0.173253	0.00778443
264	0.712176	0.102595	0.17525	0.00998004
266	0.718962	0.105389	0.164671	0.010978
268	0.706986	0.116966	0.167265	0.00878244
270	0.705389	0.114571	0.170259	0.00978044
272	0.701996	0.11018	0.178443	0.00938124
274	0.706587	0.112974	0.171257	0.00918164
276	0.69481	0.118563	0.178244	0.00838323
278	0.707585	0.116567	0.166866	0.00898204
280	0.715968	0.118563	0.156487	0.00898204
282	0.721357	0.115768	0.152495	0.0103792
284	0.731138	0.111976	0.147305	0.00958084
286	0.724152	0.119162	0.145709	0.010978
288	0.734731	0.116766	0.142116	0.00638723
290	0.732735	0.115768	0.142715	0.00878244
292	0.745908	0.11497	0.131138	0.00798403
294	0.747505	0.112375	0.131936	0.00818363
296	0.745709	0.118762	0.128144	0.00738523

## Sheet: Fig.4d
States	Population	Errbar
00	0.279826	0.00305255
01	0.06945	0.00558375
02	0.284647	0.0065414
03	1.58372e-16	7.64789e-17
04	0.00113329	0.00346118
10	0.0942565	0.00258712
11	3.41259e-17	6.52233e-17
12	0	6.47953e-17
13	0	7.67894e-17
14	3.05061e-16	5.58819e-17
20	0.251773	0.00416193
21	1.96103e-16	1.06119e-16
22	0	8.63063e-17
23	2.08405e-17	9.75236e-17
24	3.18417e-17	7.64618e-17
30	0.0189144	0.00408773
31	1.56465e-16	3.8616e-17
32	1.21709e-16	6.76525e-17
33	0	7.14708e-17
34	4.3768e-17	4.92872e-17
40	0	4.34905e-17
41	0	4.63206e-17
42	0	7.40064e-17
43	0	6.64065e-17
44	9.21527e-17	5.65646e-17

## Sheet: Fig.4e
	00	01	02	10	11	12	20	21	22
00	0.29496	0.0252971	0.0608808	0.017591	0.00403596	0.00704242	0.0456319	0.0014251	0.00111609
01	0.0252971	0.07722	0.0138326	0.0117846	0.0159868	0.000661453	0.0543607	0.00410278	0.00193308
02	0.0608808	0.0138326	0.29804	0.0239083	0.0115809	0.00649174	0.27347	0.00407649	0.0161492
10	0.017591	0.0117846	0.0239083	0.041493	0.00529968	0.00367648	0.0182588	0.00124907	0.000973858
11	0.00403596	0.0159868	0.0115809	0.00529968	0.0042003	0.000201088	0.00691043	0.00101164	0.000693112
12	0.00704242	0.000661453	0.00649174	0.00367648	0.000201088	0.00052822	0.00414467	0.000202423	0.000231865
20	0.0456319	0.0543607	0.27347	0.0182588	0.00691043	0.00414467	0.28226	0.00190535	0.0158364
21	0.0014251	0.00410278	0.00407649	0.00124907	0.00101164	0.000202423	0.00190535	0.00032906	0.000183751
22	0.00111609	0.00193308	0.0161492	0.000973858	0.000693112	0.000231865	0.0158364	0.000183751	0.00097557

## Sheet: Fig.S1a Raw Data
	Time	P1	P2
0	0	0.648039	0.527861
1	20	0.604902	0.498507
2	40	0.554902	0.491542
3	60	0.52549	0.450746
4	80	0.489216	0.394527
5	100	0.495098	0.394527
6	120	0.471569	0.347761
7	140	0.416667	0.327363
8	160	0.387255	0.308458
9	180	0.366667	0.293532
10	200	0.360784	0.244776
11	220	0.336275	0.243284
12	240	0.298039	0.235821
13	260	0.321569	0.213433
14	280	0.291176	0.198507
15	300	0.297059	0.19403
16	320	0.268627	0.179104
17	340	0.268627	0.151244
18	360	0.270588	0.164179
19	380	0.244118	0.140299
20	400	0.222549	0.136318
21	420	0.217647	0.110945
22	440	0.194118	0.128358
23	460	0.213725	0.108458
24	480	0.176471	0.102985
25	500	0.171569	0.0900498
26	520	0.180392	0.078607
27	540	0.156863	0.080597
28	560	0.131373	0.0686567
29	580	0.143137	0.0631841
30	600	0.120588	0.0661692
31	620	0.138235	0.0597015
32	640	0.12549	0.058209
33	660	0.120588	0.0552239
34	680	0.127451	0.0502488
35	700	0.109804	0.0432836
36	720	0.115686	0.0512438
37	740	0.0970588	0.0427861
38	760	0.0784314	0.0353234
39	780	0.0931373	0.0333333
40	800	0.0892157	0.0402985
41	820	0.0823529	0.0358209
42	840	0.0705882	0.0298507
43	860	0.0911765	0.0278607
44	880	0.077451	0.0218905
45	900	0.0784314	0.0273632
46	920	0.0676471	0.0253731
47	940	0.0598039	0.0253731
48	960	0.0568627	0.0243781
49	980	0.0588235	0.0258706
50	1000	0.0637255	0.0218905
51	1020	0.0607843	0.0154229
52	1040	0.054902	0.0189055
53	1060	0.0421569	0.0169154
54	1080	0.0529412	0.0233831
55	1100	0.0509804	0.0169154
56	1120	0.045098	0.0169154
57	1140	0.0352941	0.021393
58	1160	0.0470588	0.0164179
59	1180	0.0372549	0.00845771
60	1200	0.0411765	0.0159204
61	1220	0.0392157	0.018408
62	1240	0.0431373	0.0189055
63	1260	0.0362745	0.0144279
64	1280	0.0382353	0.0164179
65	1300	0.0245098	0.0129353
66	1320	0.0352941	0.0114428
67	1340	0.0411765	0.0129353
68	1360	0.0333333	0.0134328
69	1380	0.0313725	0.0144279
70	1400	0.0372549	0.00945274
71	1420	0.0343137	0.0119403
72	1440	0.0323529	0.0134328
73	1460	0.0392157	0.00845771
74	1480	0.0333333	0.0114428
75	1500	0.0294118	0.0109453
76	1520	0.0343137	0.0104478
77	1540	0.027451	0.0144279
78	1560	0.0254902	0.00995025
79	1580	0.0215686	0.0129353
80	1600	0.0235294	0.0119403
81	1620	0.0264706	0.0109453
82	1640	0.0254902	0.0169154
83	1660	0.027451	0.0104478
84	1680	0.0323529	0.0104478
85	1700	0.022549	0.0114428
86	1720	0.0205882	0.0039801
87	1740	0.022549	0.00995025
88	1760	0.0205882	0.0114428
89	1780	0.027451	0.0109453
90	1800	0.0352941	0.0104478
91	1820	0.0235294	0.00845771
92	1840	0.0215686	0.0119403
93	1860	0.0176471	0.00447761
94	1880	0.0254902	0.00995025
95	1900	0.0284314	0.0134328
96	1920	0.0284314	0.0104478
97	1940	0.0264706	0.0114428
98	1960	0.0254902	0.0104478
99	1980	0.022549	0.0129353
100	2000	0.0156863	0.0134328

## Sheet: Fig.S1bc Raw Data
	Time	P1	P2
0	0	0.263725	0.314428
1	2	0.307843	0.41393
2	4	0.406863	0.534826
3	6	0.547059	0.643284
4	8	0.647059	0.723881
5	10	0.74902	0.777114
6	12	0.805882	0.808458
7	14	0.863725	0.801493
8	16	0.82451	0.779104
9	18	0.784314	0.691542
10	20	0.705882	0.593532
11	22	0.647059	0.511443
12	24	0.502941	0.395522
13	26	0.426471	0.305473
14	28	0.294118	0.214428
15	30	0.222549	0.181095
16	32	0.139216	0.144776
17	34	0.176471	0.164677
18	36	0.171569	0.223881
19	38	0.214706	0.261194
20	40	0.317647	0.375622
21	42	0.366667	0.460697
22	44	0.532353	0.584577
23	46	0.607843	0.646766
24	48	0.745098	0.718408
25	50	0.74902	0.766667
26	52	0.836275	0.789552
27	54	0.777451	0.771642
28	56	0.801961	0.730846
29	58	0.736275	0.660199
30	60	0.642157	0.568657
31	62	0.514706	0.482587
32	64	0.471569	0.393532
33	66	0.309804	0.318408
34	68	0.258824	0.247761
35	70	0.229412	0.20597
36	72	0.159804	0.164179
37	74	0.198039	0.191045
38	76	0.192157	0.238806
39	78	0.341176	0.29204
40	80	0.366667	0.368159
41	82	0.519608	0.470647
42	84	0.594118	0.543781
43	86	0.67549	0.633831
44	88	0.722549	0.671144
45	90	0.777451	0.758706
46	92	0.812745	0.737313
47	94	0.786275	0.741791
48	96	0.730392	0.732338
49	98	0.666667	0.654229
50	100	0.584314	0.576617
51	102	0.466667	0.488557
52	104	0.383333	0.370149
53	106	0.27451	0.347761
54	108	0.229412	0.253731
55	110	0.17549	0.224378
56	112	0.208824	0.190547
57	114	0.230392	0.222886
58	116	0.286275	0.259701
59	118	0.384314	0.299502
60	120	0.478431	0.410945
61	122	0.594118	0.490547
62	124	0.64902	0.549751
63	126	0.741176	0.604975
64	128	0.77549	0.673134
65	130	0.8	0.7199
66	132	0.77451	0.770149
67	134	0.743137	0.738806
68	136	0.653922	0.704975
69	138	0.611765	0.635821
70	140	0.490196	0.549751
71	142	0.410784	0.474129
72	144	0.290196	0.428856
73	146	0.261765	0.324876
74	148	0.212745	0.262687
75	150	0.236275	0.234328
76	152	0.239216	0.206468
77	154	0.278431	0.241294
78	156	0.365686	0.267662
79	158	0.410784	0.322886
80	160	0.529412	0.391542
81	162	0.569608	0.462687
82	164	0.70098	0.544776
83	166	0.711765	0.628358
84	168	0.784314	0.673632
85	170	0.733333	0.701493
86	172	0.75098	0.728358
87	174	0.668627	0.729353
88	176	0.62451	0.668657
89	178	0.483333	0.638308
90	180	0.412745	0.558209
91	182	0.364706	0.499005
92	184	0.306863	0.418905
93	186	0.212745	0.334826
94	188	0.213725	0.272139
95	190	0.272549	0.228358
96	192	0.25098	0.225373
97	194	0.384314	0.230348
98	196	0.416667	0.28209
99	198	0.514706	0.324378
100	200	0.555882	0.387562
101	202	0.683333	0.446766
102	204	0.715686	0.523383
103	206	0.785294	0.609453
104	208	0.735294	0.671144
105	210	0.745098	0.70199
106	212	0.677451	0.700498
107	214	0.587255	0.684577
108	216	0.517647	0.653234
109	218	0.421569	0.602985
110	220	0.369608	0.564179
111	222	0.3	0.487562
112	224	0.287255	0.422388
113	226	0.214706	0.342786
114	228	0.280392	0.275622
115	230	0.276471	0.272139
116	232	0.351961	0.242289
117	234	0.435294	0.263682
118	236	0.509804	0.281095
119	238	0.57549	0.354726
120	240	0.65	0.402488
121	242	0.72549	0.441791
122	244	0.72451	0.538308
123	246	0.756863	0.579602
124	248	0.712745	0.629851
125	250	0.702941	0.676617
126	252	0.603922	0.688557
127	254	0.562745	0.664677
128	256	0.455882	0.646269
129	258	0.403922	0.614925
130	260	0.312745	0.526866
131	262	0.27549	0.487562
132	264	0.257843	0.412935
133	266	0.242157	0.354229
134	268	0.32549	0.298507
135	270	0.304902	0.265174
136	272	0.405882	0.278109
137	274	0.478431	0.276119
138	276	0.598039	0.315423
139	278	0.605882	0.352239
140	280	0.728431	0.381095
141	282	0.70098	0.452736
142	284	0.762745	0.524876
143	286	0.682353	0.603483
144	288	0.696078	0.623383
145	290	0.577451	0.674627
146	292	0.579412	0.654726
147	294	0.45098	0.647264
148	296	0.420588	0.630348
149	298	0.314706	0.58408
150	300	0.254902	0.543284
151	302	0.289216	0.458209
152	304	0.245098	0.412438
153	306	0.341176	0.328358
154	308	0.316667	0.306468
155	310	0.45	0.28209
156	312	0.437255	0.280597
157	314	0.611765	0.278109
158	316	0.6	0.300995
159	318	0.681373	0.341294
160	320	0.714706	0.405473
161	322	0.722549	0.457711
162	324	0.696078	0.545274
163	326	0.695098	0.574129
164	328	0.606863	0.627363
165	330	0.559804	0.627363
166	332	0.495098	0.638308
167	334	0.387255	0.630846
168	336	0.373529	0.613433
169	338	0.285294	0.584577
170	340	0.308824	0.539303
171	342	0.247059	0.466169
172	344	0.327451	0.394527
173	346	0.326471	0.360199
174	348	0.402941	0.327363
175	350	0.451961	0.296517
176	352	0.533333	0.312438
177	354	0.629412	0.288557
178	356	0.643137	0.334328
179	358	0.72549	0.360697
180	360	0.677451	0.412935
181	362	0.70098	0.498507
182	364	0.636275	0.545771
183	366	0.643137	0.59005
184	368	0.494118	0.587065
185	370	0.522549	0.610945
186	372	0.386275	0.620896
187	374	0.37549	0.630348
188	376	0.285294	0.589552
189	378	0.305882	0.552239
190	380	0.287255	0.516915
191	382	0.305882	0.463682
192	384	0.380392	0.397015
193	386	0.39902	0.367164
194	388	0.484314	0.339801
195	390	0.49902	0.297512
196	392	0.643137	0.278109
197	394	0.626471	0.310945
198	396	0.715686	0.340299
199	398	0.683333	0.376617
200	400	0.714706	0.429353
201	402	0.643137	0.48607
202	404	0.65	0.542289
203	406	0.548039	0.549751
204	408	0.540196	0.570647
205	410	0.437255	0.61393
206	412	0.391176	0.627363
207	414	0.332353	0.624876
208	416	0.289216	0.596517
209	418	0.342157	0.550249
210	420	0.295098	0.5199
211	422	0.394118	0.493035
212	424	0.366667	0.403483
213	426	0.459804	0.372637
214	428	0.471569	0.353234
215	430	0.603922	0.335323
216	432	0.633333	0.308458
217	434	0.669608	0.292537
218	436	0.683333	0.354726
219	438	0.683333	0.39204
220	440	0.669608	0.446766
221	442	0.62549	0.464677
222	444	0.569608	0.501493
223	446	0.514706	0.555224
224	448	0.479412	0.592537
225	450	0.338235	0.6199
226	452	0.347059	0.620398
227	454	0.266667	0.60199
228	456	0.34902	0.575124
229	458	0.285294	0.533333
230	460	0.385294	0.530348
231	462	0.395098	0.467164
232	464	0.473529	0.423383
233	466	0.504902	0.368159
234	468	0.566667	0.352239
235	470	0.631373	0.328358
236	472	0.662745	0.308458
237	474	0.703922	0.343284
238	476	0.621569	0.346766
239	478	0.676471	0.407463
240	480	0.562745	0.422886
241	482	0.607843	0.453234
242	484	0.463725	0.487562
243	486	0.485294	0.554726
244	488	0.360784	0.564677
245	490	0.364706	0.590547
246	492	0.336275	0.599005
247	494	0.337255	0.582587
248	496	0.32451	0.557711
249	498	0.351961	0.531841
250	500	0.403922	0.501493
251	502	0.445098	0.445274
252	504	0.516667	0.444279
253	506	0.522549	0.365174
254	508	0.640196	0.357711
255	510	0.619608	0.339801
256	512	0.715686	0.323881
257	514	0.647059	0.349254
258	516	0.684314	0.366169
259	518	0.557843	0.414925
260	520	0.578431	0.425373
261	522	0.49902	0.482587
262	524	0.453922	0.515423
263	526	0.395098	0.515423
264	528	0.319608	0.59403
265	530	0.35098	0.608458
266	532	0.279412	0.59204
267	534	0.370588	0.585572
268	536	0.347059	0.550249
269	538	0.420588	0.518905
270	540	0.440196	0.481592
271	542	0.547059	0.454229
272	544	0.522549	0.427363
273	546	0.613725	0.371144
274	548	0.626471	0.327861
275	550	0.668627	0.333831
276	552	0.653922	0.349254
277	554	0.62549	0.358706
278	556	0.610784	0.376119
279	558	0.590196	0.422886
280	560	0.535294	0.445274
281	562	0.465686	0.475622
282	564	0.440196	0.51592
283	566	0.331373	0.536816
284	568	0.379412	0.579104
285	570	0.312745	0.589552
286	572	0.367647	0.581095
287	574	0.362745	0.562687
288	576	0.426471	0.544279
289	578	0.440196	0.51194
290	580	0.492157	0.4801
291	582	0.543137	0.454726
292	584	0.570588	0.393035
293	586	0.627451	0.375622
294	588	0.62451	0.355224
295	590	0.661765	0.358706
296	592	0.605882	0.354726
297	594	0.653922	0.356716
298	596	0.530392	0.389552
299	598	0.568627	0.40398
300	600	0.473529	0.435323
301	602	0.466667	0.479602
302	604	0.363725	0.502488
303	606	0.403922	0.547761
304	608	0.322549	0.581095
305	610	0.35098	0.595025
306	612	0.384314	0.564179
307	614	0.390196	0.563184
308	616	0.458824	0.541294
309	618	0.440196	0.531841
310	620	0.557843	0.49602
311	622	0.555882	0.434328
312	624	0.659804	0.416915
313	626	0.597059	0.377114
314	628	0.676471	0.373134
315	630	0.637255	0.378109
316	632	0.630392	0.379602
317	634	0.577451	0.377612
318	636	0.596078	0.368657
319	638	0.484314	0.426866
320	640	0.459804	0.464179
321	642	0.39902	0.485572
322	644	0.346078	0.50597
323	646	0.385294	0.564179
324	648	0.327451	0.554229
325	650	0.4	0.539303
326	652	0.366667	0.564179
327	654	0.454902	0.546269
328	656	0.467647	0.538308
329	658	0.544118	0.478607
330	660	0.533333	0.464677
331	662	0.615686	0.429353
332	664	0.613725	0.40199
333	666	0.618627	0.374627
334	668	0.628431	0.354726
335	670	0.62549	0.396517
336	672	0.583333	0.383582
337	674	0.536275	0.381095
338	676	0.518627	0.379602
339	678	0.403922	0.424876
340	680	0.472549	0.452736
341	682	0.359804	0.493532
342	684	0.383333	0.519403
343	686	0.337255	0.552239
344	688	0.39902	0.554229
345	690	0.393137	0.541791
346	692	0.444118	0.553234
347	694	0.45	0.566169
348	696	0.505882	0.532338
349	698	0.582353	0.512438
350	700	0.559804	0.462189
351	702	0.659804	0.445771
352	704	0.60098	0.400498
353	706	0.656863	0.393035
354	708	0.597059	0.39801
355	710	0.621569	0.375622
356	712	0.511765	0.367662
357	714	0.539216	0.406965
358	716	0.458824	0.399005
359	718	0.454902	0.440796
360	720	0.366667	0.462687
361	722	0.37451	0.490547
362	724	0.342157	0.508955
363	726	0.359804	0.533333
364	728	0.404902	0.522886
365	730	0.381373	0.543284
366	732	0.50098	0.546766
367	734	0.498039	0.544776
368	736	0.590196	0.50199
369	738	0.565686	0.493532
370	740	0.62451	0.465174
371	742	0.576471	0.450746
372	744	0.633333	0.434328
373	746	0.555882	0.401493
374	748	0.582353	0.381095
375	750	0.523529	0.404975
376	752	0.512745	0.375622
377	754	0.488235	0.383085
378	756	0.431373	0.428358
379	758	0.448039	0.430348
380	760	0.35098	0.449751
381	762	0.39902	0.484577
382	764	0.336275	0.534328
383	766	0.426471	0.521393
384	768	0.401961	0.530846
385	770	0.496078	0.521891
386	772	0.47549	0.540796
387	774	0.564706	0.552736
388	776	0.570588	0.525871
389	778	0.626471	0.508458
390	780	0.621569	0.462687
391	782	0.626471	0.445771
392	784	0.641176	0.406965
393	786	0.547059	0.414428
394	788	0.564706	0.39602
395	790	0.482353	0.381592
396	792	0.542157	0.380597
397	794	0.389216	0.412935
398	796	0.473529	0.432338
399	798	0.373529	0.460697
400	800	0.426471	0.479602
401	802	0.385294	0.48209
402	804	0.423529	0.516915
403	806	0.439216	0.510448
404	808	0.468627	0.546269
405	810	0.49902	0.555721
406	812	0.505882	0.540796
407	814	0.607843	0.546269
408	816	0.57451	0.49602
409	818	0.637255	0.465672
410	820	0.567647	0.467662
411	822	0.62451	0.460199
412	824	0.516667	0.41791
413	826	0.567647	0.436318
414	828	0.485294	0.385075
415	830	0.49902	0.39602
416	832	0.418627	0.39403
417	834	0.413725	0.403483
418	836	0.397059	0.428856
419	838	0.386275	0.445274
420	840	0.390196	0.465174
421	842	0.382353	0.49602
422	844	0.433333	0.507463
423	846	0.428431	0.51592
424	848	0.551961	0.532836
425	850	0.481373	0.541791
426	852	0.612745	0.513433
427	854	0.565686	0.50199
428	856	0.653922	0.491542
429	858	0.580392	0.488557
430	860	0.611765	0.464179
431	862	0.547059	0.475124
432	864	0.581373	0.433831
433	866	0.513725	0.400995
434	868	0.510784	0.393035
435	870	0.435294	0.383085
436	872	0.423529	0.39801
437	874	0.436275	0.422388
438	876	0.354902	0.445274
439	878	0.417647	0.459701
440	880	0.387255	0.458706
441	882	0.457843	0.48209
442	884	0.443137	0.49801
443	886	0.509804	0.529851
444	888	0.518627	0.543781
445	890	0.606863	0.537811
446	892	0.576471	0.525871
447	894	0.621569	0.497015
448	896	0.617647	0.505473
449	898	0.60098	0.476119
450	900	0.567647	0.463184
451	902	0.530392	0.451741
452	904	0.514706	0.427861
453	906	0.445098	0.396517
454	908	0.498039	0.38806
455	910	0.390196	0.408458
456	912	0.423529	0.413433
457	914	0.351961	0.422886
458	916	0.480392	0.430846
459	918	0.389216	0.418905
460	920	0.439216	0.459701
461	922	0.45098	0.473632
462	924	0.478431	0.51393
463	926	0.535294	0.5199
464	928	0.52451	0.531343
465	930	0.585294	0.511443
466	932	0.545098	0.51791
467	934	0.620588	0.483582
468	936	0.568627	0.486567
469	938	0.609804	0.471144
470	940	0.515686	0.454229
471	942	0.552941	0.459701
472	944	0.463725	0.423383
473	946	0.473529	0.428856
474	948	0.415686	0.412935
475	950	0.451961	0.404975
476	952	0.391176	0.422388
477	954	0.415686	0.438308
478	956	0.429412	0.449751
479	958	0.409804	0.435323
480	960	0.5	0.464179
481	962	0.426471	0.49005
482	964	0.541176	0.508955
483	966	0.510784	0.525373
484	968	0.610784	0.506965
485	970	0.570588	0.512438
486	972	0.618627	0.513433
487	974	0.556863	0.496517
488	976	0.571569	0.502985
489	978	0.519608	0.481592
490	980	0.523529	0.443781
491	982	0.508824	0.429353
492	984	0.463725	0.424378
493	986	0.451961	0.425373
494	988	0.418627	0.421891
495	990	0.415686	0.422388
496	992	0.408824	0.443781
497	994	0.434314	0.434328
498	996	0.423529	0.446766
499	998	0.485294	0.457711

## Sheet: Fig.S2c Raw Data
	Time	P
0	2	0.0166667
1	4	0.0343137
2	6	0.0598039
3	8	0.111765
4	10	0.187255
5	12	0.22549
6	14	0.24902
7	16	0.281373
8	18	0.304902
9	20	0.332353
10	22	0.365686
11	24	0.333333
12	26	0.355882
13	28	0.361765
14	30	0.380392
15	32	0.390196
16	34	0.381373
17	36	0.355882
18	38	0.32549
19	40	0.292157
20	42	0.27549
21	44	0.255882
22	46	0.210784
23	48	0.205882
24	50	0.191176
25	52	0.17451
26	54	0.158824
27	56	0.148039
28	58	0.130392
29	60	0.109804
30	62	0.0823529
31	64	0.114706
32	66	0.0990196
33	68	0.101961
34	70	0.128431
35	72	0.128431
36	74	0.121569
37	76	0.154902
38	78	0.161765
39	80	0.154902
40	82	0.170588
41	84	0.197059
42	86	0.207843
43	88	0.205882
44	90	0.219608
45	92	0.245098
46	94	0.24902
47	96	0.263725
48	98	0.272549
49	100	0.242157
50	102	0.288235
51	104	0.278431
52	106	0.283333
53	108	0.27451
54	110	0.268627
55	112	0.264706
56	114	0.236275
57	116	0.226471
58	118	0.232353
59	120	0.202941
60	122	0.187255
61	124	0.17549
62	126	0.147059
63	128	0.145098
64	130	0.113725
65	132	0.0862745
66	134	0.0745098
67	136	0.0833333
68	138	0.0803922
69	140	0.0862745
70	142	0.0813725
71	144	0.0931373
72	146	0.0980392
73	148	0.130392
74	150	0.123529
75	152	0.148039
76	154	0.159804
77	156	0.213725
78	158	0.192157
79	160	0.228431
80	162	0.230392
81	164	0.255882
82	166	0.283333
83	168	0.301961
84	170	0.320588
85	172	0.3
86	174	0.294118
87	176	0.262745
88	178	0.226471
89	180	0.241176
90	182	0.198039
91	184	0.169608
92	186	0.169608
93	188	0.155882
94	190	0.0941176
95	192	0.115686
96	194	0.0990196
97	196	0.0803922
98	198	0.0803922
99	200	0.0803922

[truncated: 2 more sheets: Fig.S3a Raw Data, Fig.S3c Raw Data]
